# Supplementary material for: Determination and Quantification of Acetaldehyde, Acetone, and Methanol in Hand Sanitizers Using Headspace GC/MS: Effect of Storage Time and Temperature
Source: MDPI journal article supplement (doi:10.3390/ijerph21010074), 2024-01-09
Supplement: s1 [file s1]

## ***Supplementary Information***

### **Determination and quantification of acetaldehyde, acetone and methanol in Hand sanitizers using Headspace GC-MS: Effect of storage time and temperature.**

Chessa To and Jacob A. Theruvathu\*

**Table S1:** GC-MS analysis of active ingredients and impurities possibly found in commercial hand sanitizers.

| <b>Compound</b>        | <b>Retention time (min)</b> | <b>Maor ion (m/z)</b> | <b>Other ions (m/z)</b> |
|------------------------|-----------------------------|-----------------------|-------------------------|
| <b>Methanol</b>        | 4.66                        | 31                    | 32                      |
| <b>Methanol-d4</b>     | 4.581                       | 33                    | 34, 35                  |
| <b>Ethanol</b>         | 5.358                       | 31                    | 45, 46, 43              |
| <b>Ethanol-d6</b>      | 5.246                       | 33                    | 49, 51, 34              |
| <b>Isopropanol</b>     | 5.262                       | 45                    | 43, 41, 39              |
| <b>Isopropanol-d8</b>  | 5.132                       | 49                    | 46, 50                  |
| <b>N-propanol</b>      | 7.220                       | 31                    | 59, 42, 60              |
| <b>Acetaldehyde</b>    | 2.197                       | 44                    | 43, 42, 45              |
| <b>Acetaldehyde-d4</b> | 2.197                       | 48                    | 46, 44                  |

\*Main ion fragments account for 100% in relative abundance. Other ion fragments were arranged in descending relative abundance.
